# Supplementary material
Source: Springer Nature journal article supplement (https://www.springermedizin.de/resource/supplementary/13012_2011_393_MOESM1_ESM.pdf/9629954)
Supplement: MOESM1 [file 9629954]

# I NEEDS ASSESSMENT

Describe population health status

Define best-practice care by competency for each subpopulation

# II REGIONAL SERVICE REQUIREMENT

Determine FTE competency requirement

Determine service requirements by occupation to deliver competencies

# III POLICY IMPLICATIONS

Compare demand and supply

Ascertain resource and health service implications

Ascertain education and training implications
